CORRECTION

# Correction: Therapist Effects and the Impact of Early Therapeutic Alliance on Symptomatic Outcome in Chronic Fatigue Syndrome

Lucy P. Goldsmith, Graham Dunn, Richard P. Bentall, Shôn W. Lewis, Alison J. Wearden

## Notice of Republication

S1 Dataset was published in error. The error was corrected in the XML and PDF versions of this article on May 9, 2016. Please download this article again to view the correct version.

## Reference

1. Goldsmith LP, Dunn G, Bentall RP, Lewis SW, Wearden AJ (2015) Therapist Effects and the Impact of Early Therapeutic Alliance on Symptomatic Outcome in Chronic Fatigue Syndrome. PLoS ONE 10(12): e0144623. doi: [10.1371/journal.pone.0144623](https://doi.org/10.1371/journal.pone.0144623) PMID: [26657793](https://pubmed.ncbi.nlm.nih.gov/26657793/)

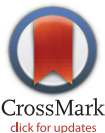

## OPEN ACCESS

**Citation:** Goldsmith LP, Dunn G, Bentall RP, Lewis SW, Wearden AJ (2016) Correction: Therapist Effects and the Impact of Early Therapeutic Alliance on Symptomatic Outcome in Chronic Fatigue Syndrome. PLoS ONE 11(5): e0156120. doi:10.1371/journal.pone.0156120

**Published:** May 18, 2016

**Copyright:** © 2016 Goldsmith et al. This is an open access article distributed under the terms of the [Creative Commons Attribution License](https://creativecommons.org/licenses/by/4.0/), which permits unrestricted use, distribution, and reproduction in any medium, provided the original author and source are credited.
